# Supplementary material for: Climate Change May Alter Breeding Ground Distributions of Eastern Migratory Monarchs (Danaus plexippus) via Range Expansion of Asclepias Host Plants
Source: PubMed Central journal article supplement (PMC4338007; doi:10.1371/journal.pone.0118614), 2015-02-23

## *A. curassavica*

### Variable contribution

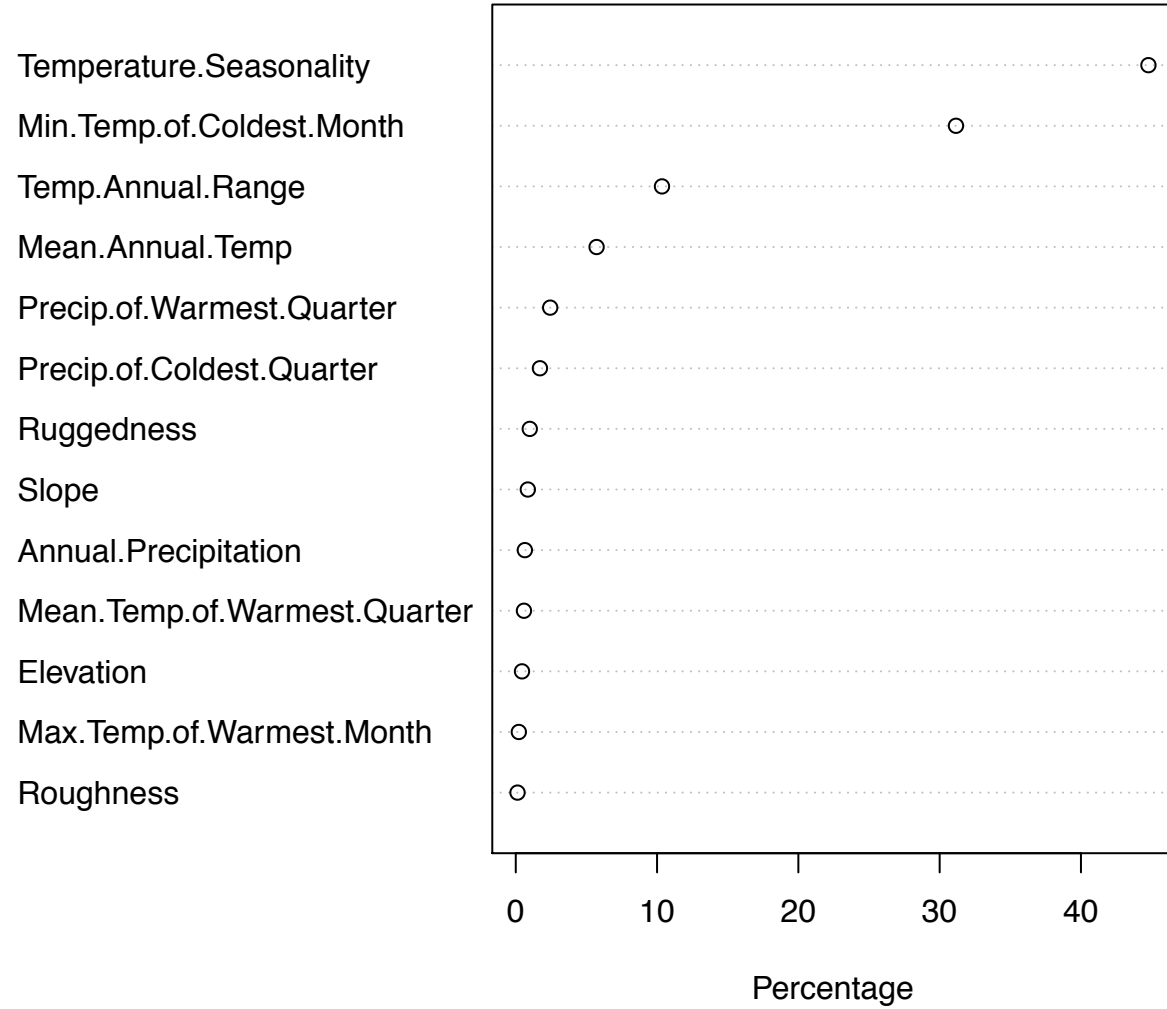

## *A. fascicularis*

### Variable contribution

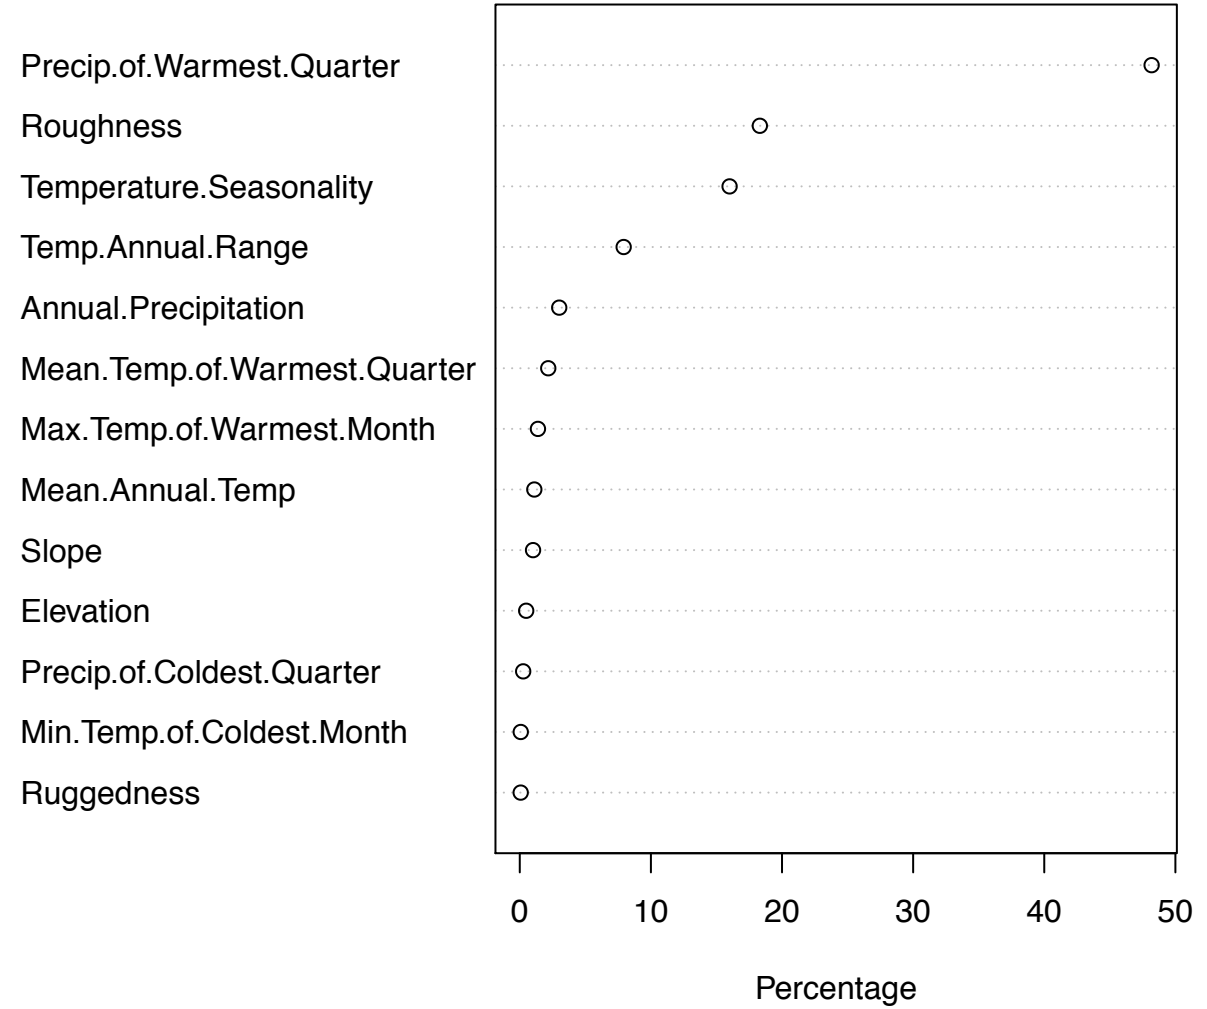

## *A. incarnata*

### Variable contribution

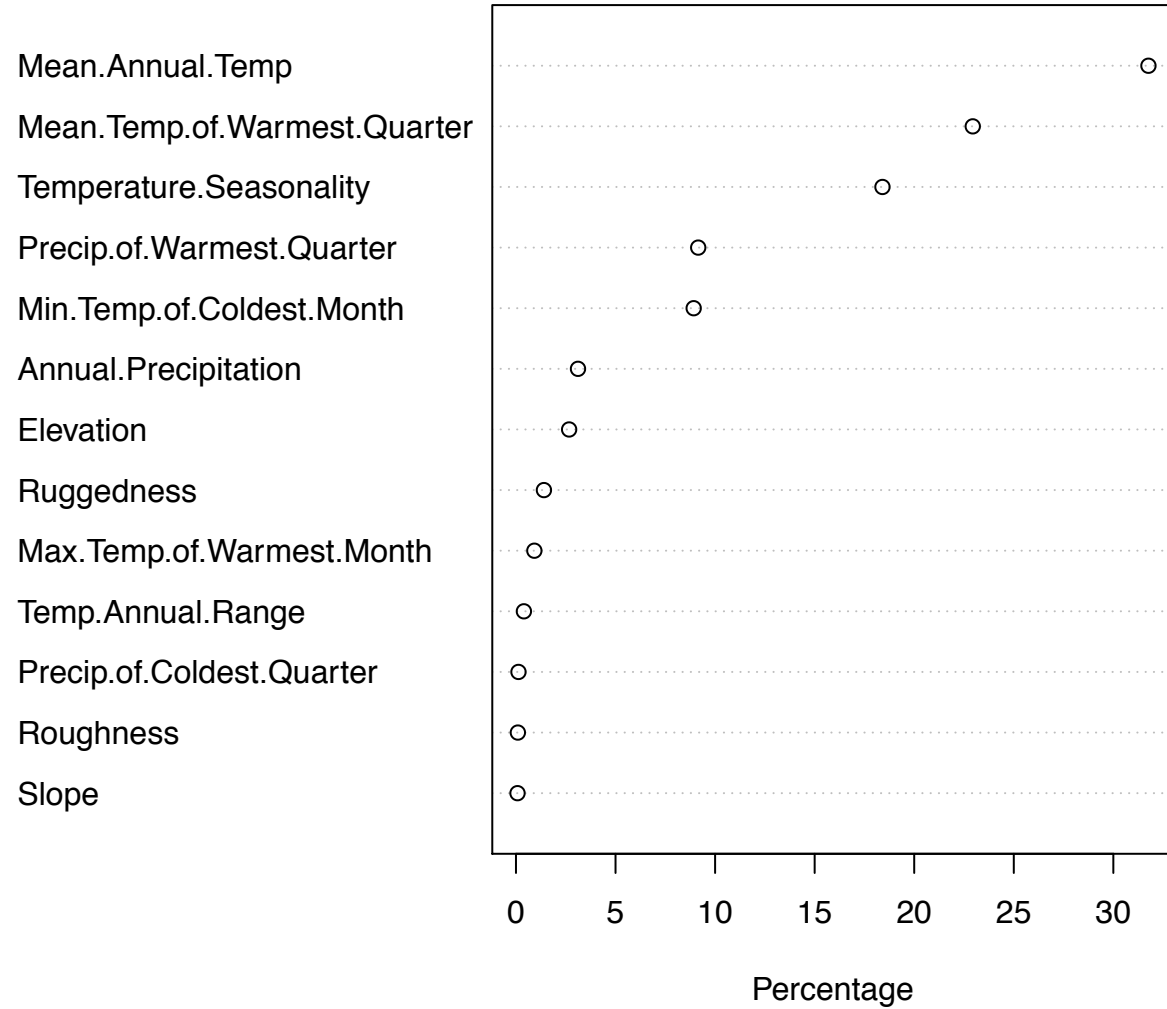

## *A. purpurascens*

### Variable contribution

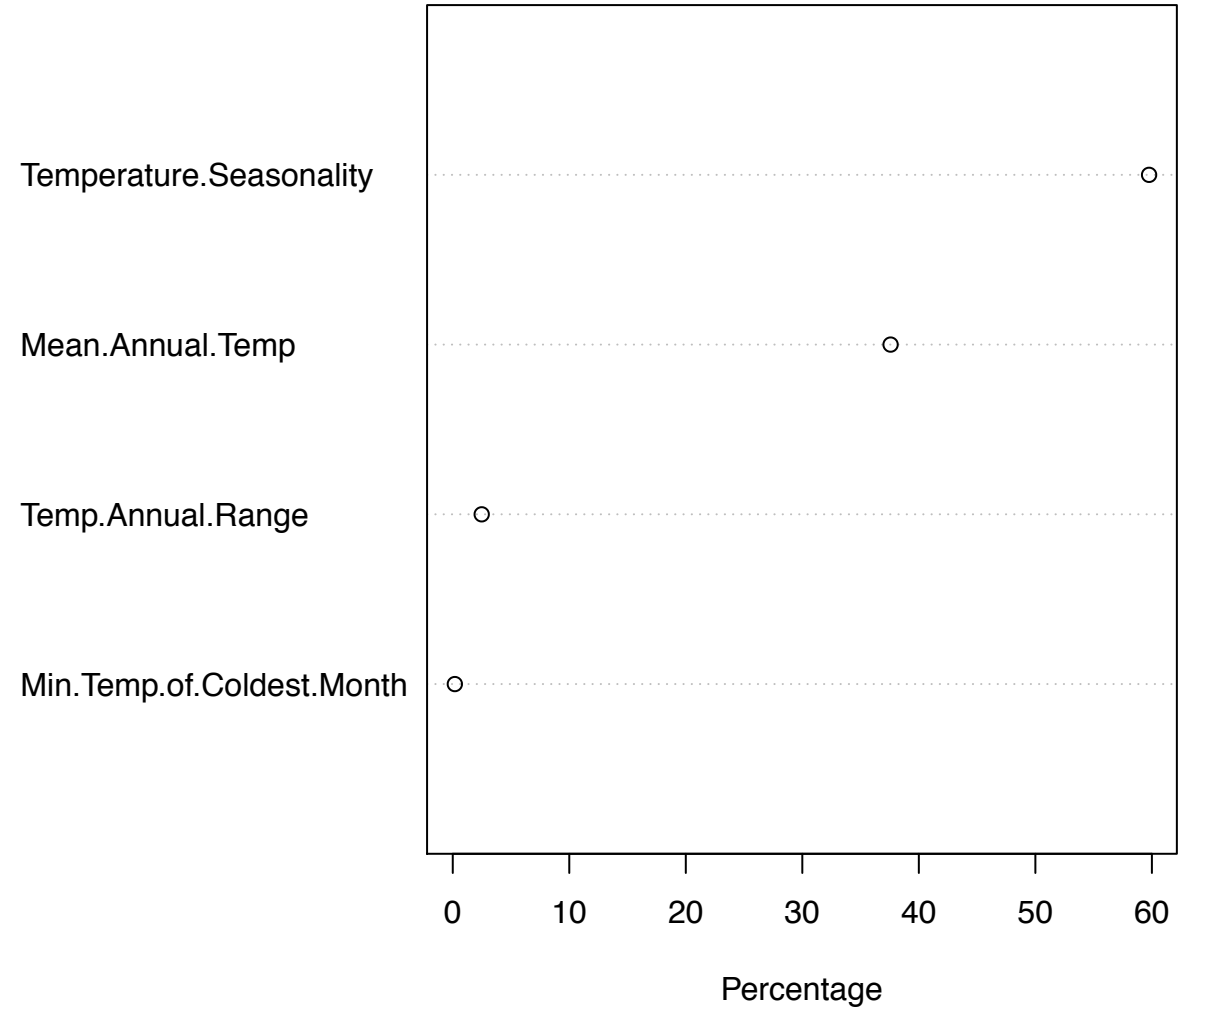

## *A. speciosa*

### Variable contribution

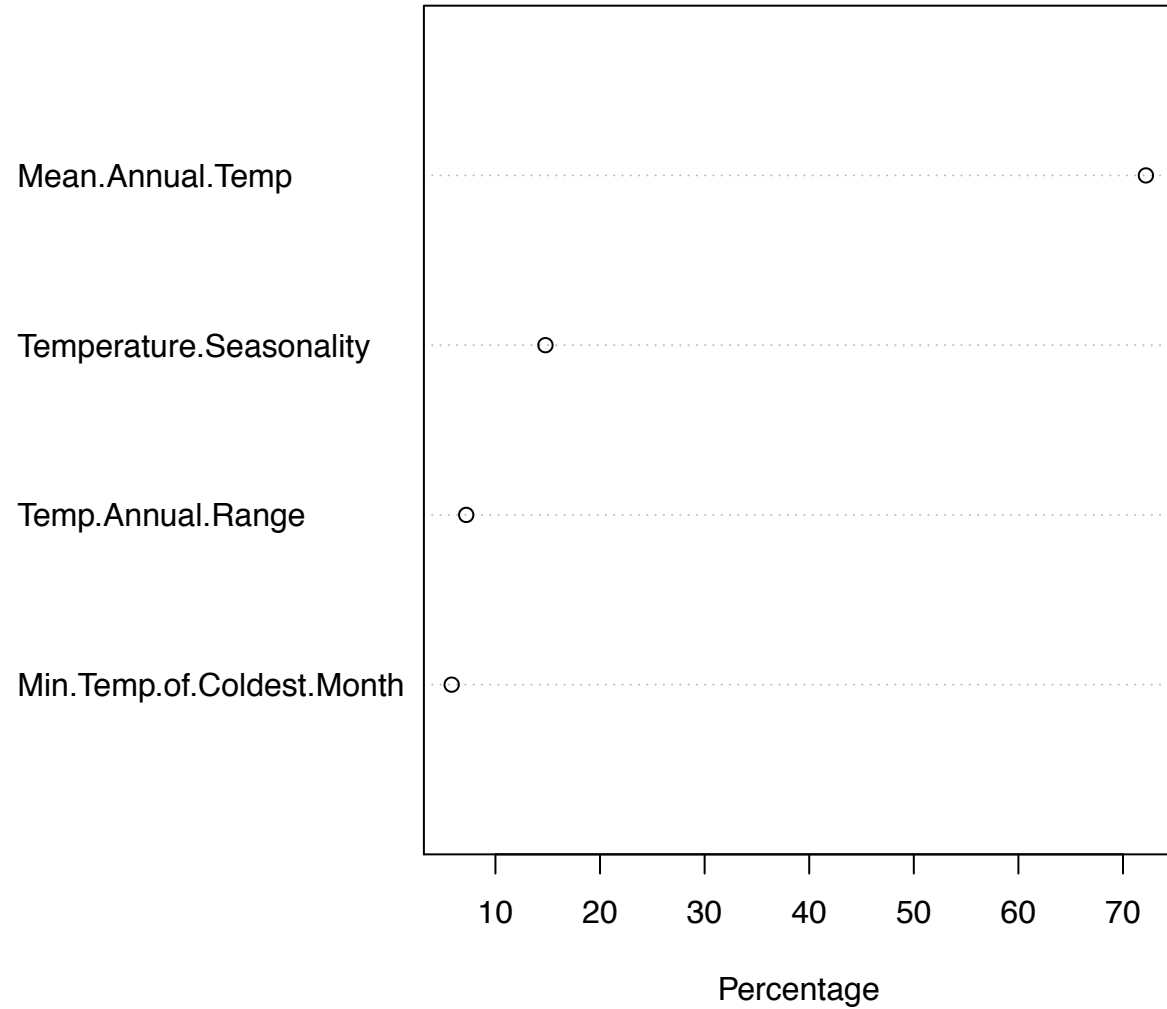

## *A. syriaca*

### Variable contribution

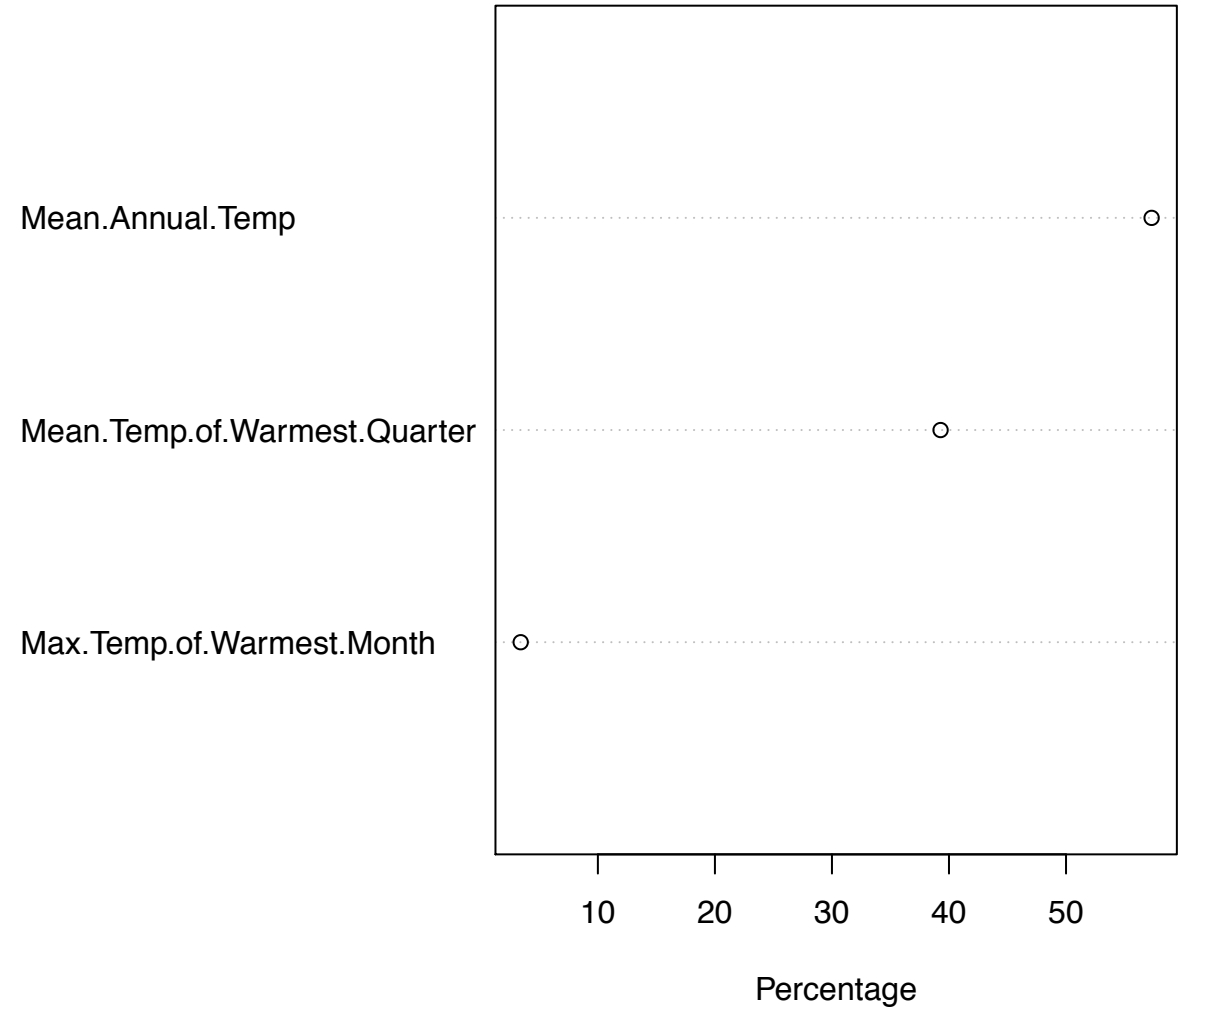

## *A. tuberosa*

### Variable contribution

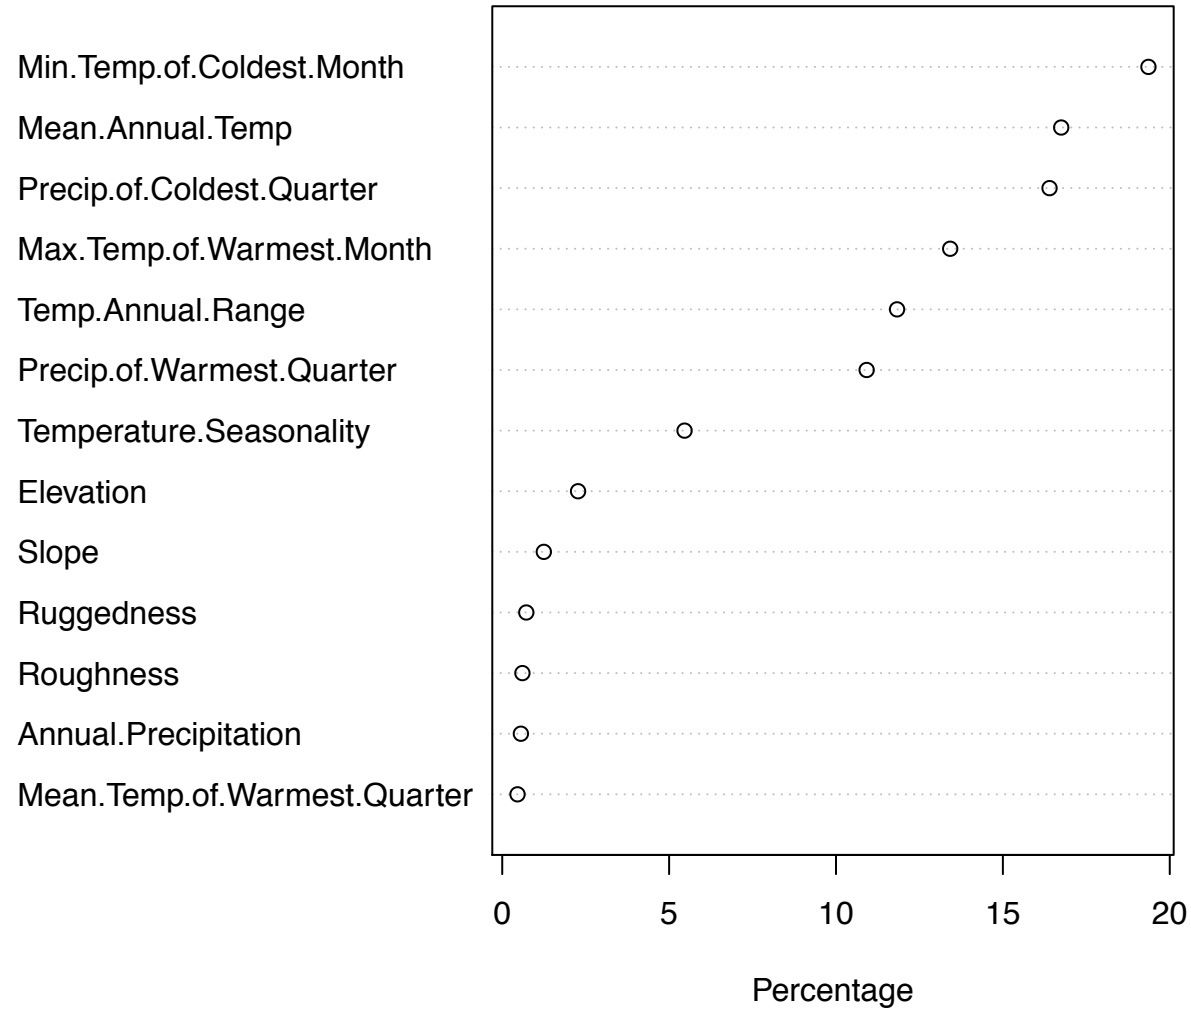

## *A. viridis*

### Variable contribution

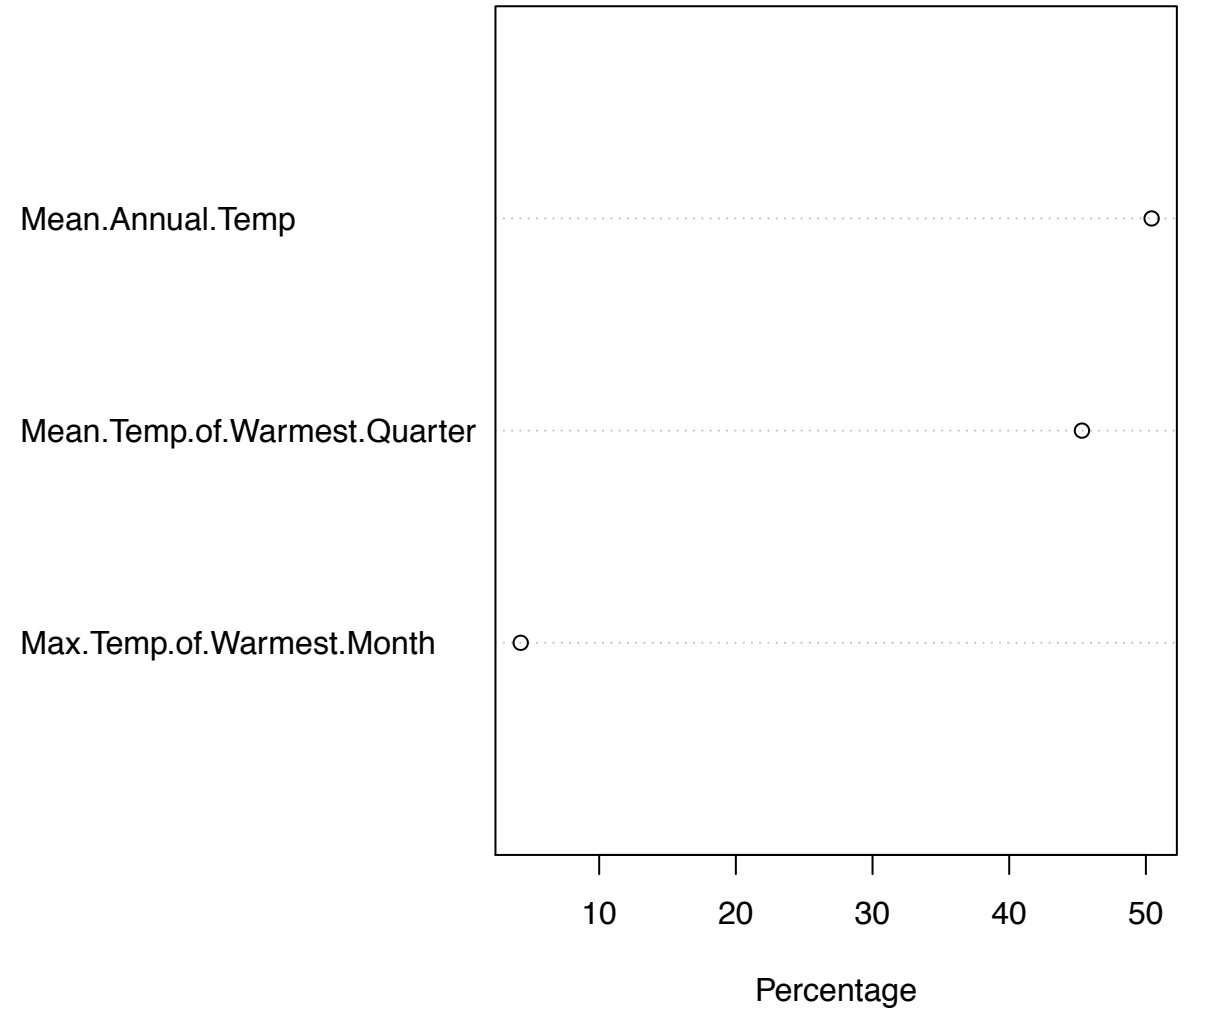

Supplement: pone.0118614.s003.pdf [file pone.0118614.s003.pdf]
